# Supplementary material for: Quality by Design-Based Development of Solid Self-Emulsifying Drug Delivery System (SEDDS) as a Potential Carrier for Oral Delivery of Lysozyme
Source: MDPI journal article supplement (doi:10.3390/pharmaceutics15030995), 2023-03-20
Supplement: s1 [file s1]

## SUPPLEMENTARY MATERIAL

**Table S1.** Design matrix for factor screening as per two-level five-factor fractional factorial design ( $2^{5-2}$ ).

| <i>Experiment</i> | <i>Molar ratio<br/>(LYS:SDS)<br/><math>X_1</math></i> | <i>pH<br/><math>X_2</math></i> | <i>Mixing speed<br/>(rpm)<br/><math>X_3</math></i> | <i>Mixing time<br/>(min.)<br/><math>X_4</math></i> | <i>Temperature<br/>(°C)<br/><math>X_5</math></i> |
|-------------------|-------------------------------------------------------|--------------------------------|----------------------------------------------------|----------------------------------------------------|--------------------------------------------------|
| 1                 | 1:2                                                   | 4                              | 300                                                | 30                                                 | 37                                               |
| 2                 | 1:6                                                   | 4                              | 300                                                | 15                                                 | 25                                               |
| 3                 | 1:2                                                   | 9                              | 300                                                | 15                                                 | 37                                               |
| 4                 | 1:6                                                   | 9                              | 300                                                | 15                                                 | 25                                               |
| 5                 | 1:2                                                   | 4                              | 600                                                | 30                                                 | 25                                               |
| 6                 | 1:6                                                   | 4                              | 600                                                | 30                                                 | 37                                               |
| 7                 | 1:2                                                   | 9                              | 600                                                | 15                                                 | 25                                               |
| 8                 | 1:6                                                   | 9                              | 600                                                | 30                                                 | 37                                               |

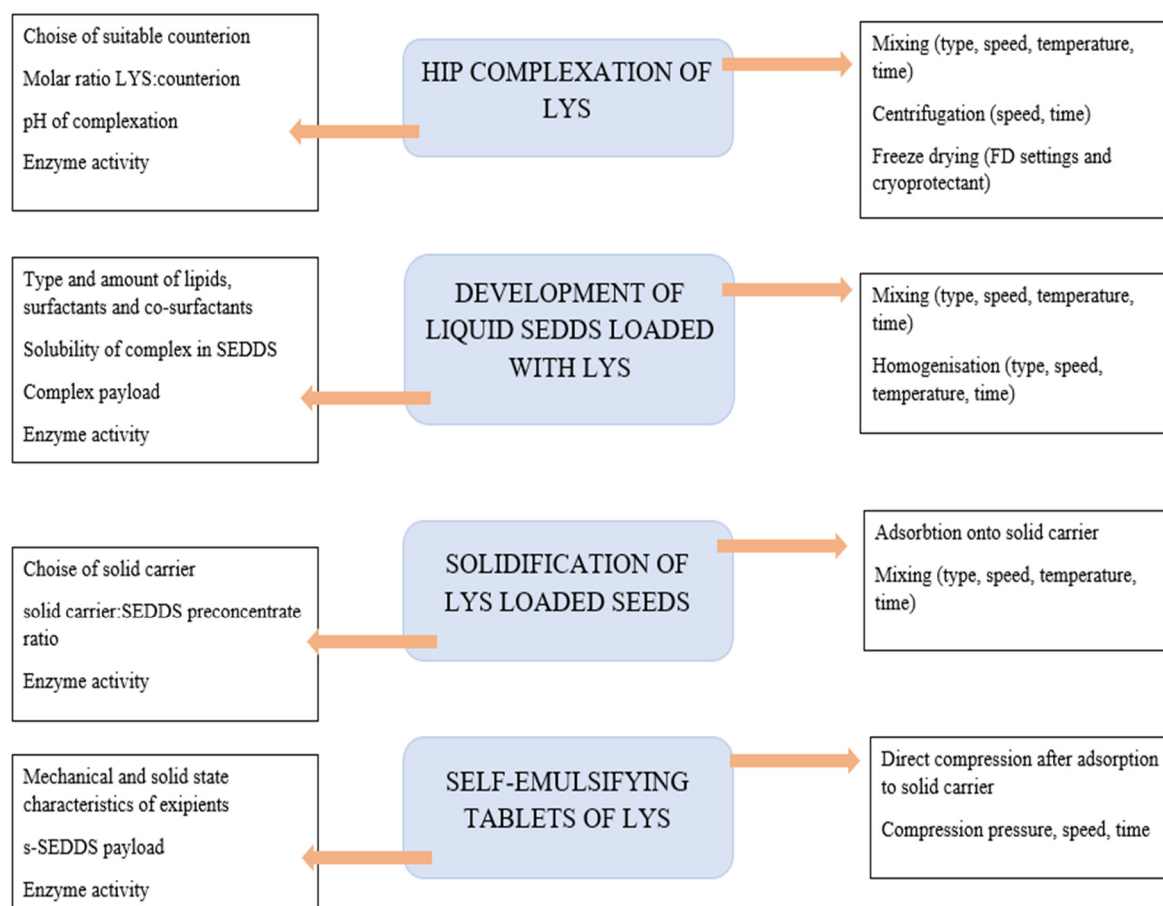

**Figure S1.** Flow chart of the development process.

**Table S2.** Interdependence rating between CMAs/CPPs, and CQAs -liquid SEDDS.

| CQA                       | CMAs/CPPs       |                      |                         |             |              |                    |             |                               |
|---------------------------|-----------------|----------------------|-------------------------|-------------|--------------|--------------------|-------------|-------------------------------|
|                           | Amount of lipid | Amount of surfactant | Amount of co-surfactant | Mixing type | Mixing speed | Mixing temperature | Mixing time | pH and type of dilution media |
| Droplet size              | High            | High                 | High                    | Medium      | Medium       | Medium             | High        | High                          |
| Zeta potential            | High            | Medium               | High                    | Medium      | Low          | Low                | Low         | High                          |
| PdI                       | High            | High                 | High                    | Medium      | Medium       | Medium             | High        | High                          |
| Emulsification efficiency | High            | High                 | High                    | Medium      | Medium       | Medium             | High        | High                          |
| HIPs payload              | Medium          | High                 | High                    | Low         | Low          | Low                | Low         | High                          |
| Release profile           | High            | High                 | High                    | Medium      | Medium       | Medium             | Medium      | Medium                        |
| Permeability              | High            | High                 | High                    | Low         | Low          | Low                | Low         | Medium                        |
| Enzyme sensitivity        | Medium          | High                 | Medium                  | Medium      | Medium       | Medium             | Medium      | High                          |

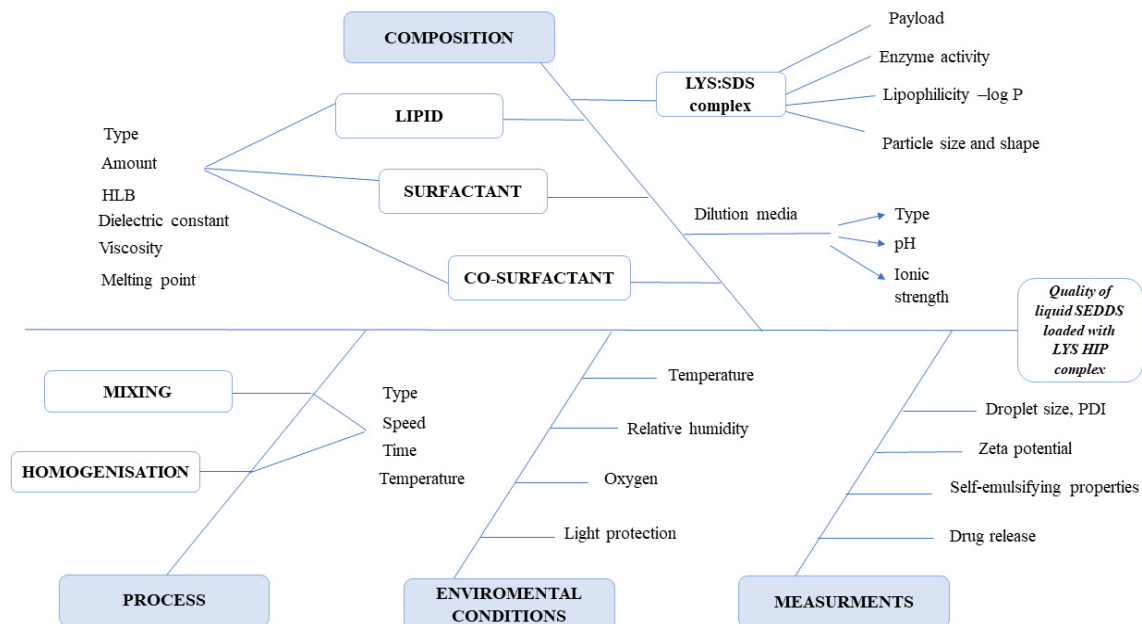

**Figure S2.** Ishikawa diagram -the quality of liquid SEDDS loaded with LYS HIP complex.

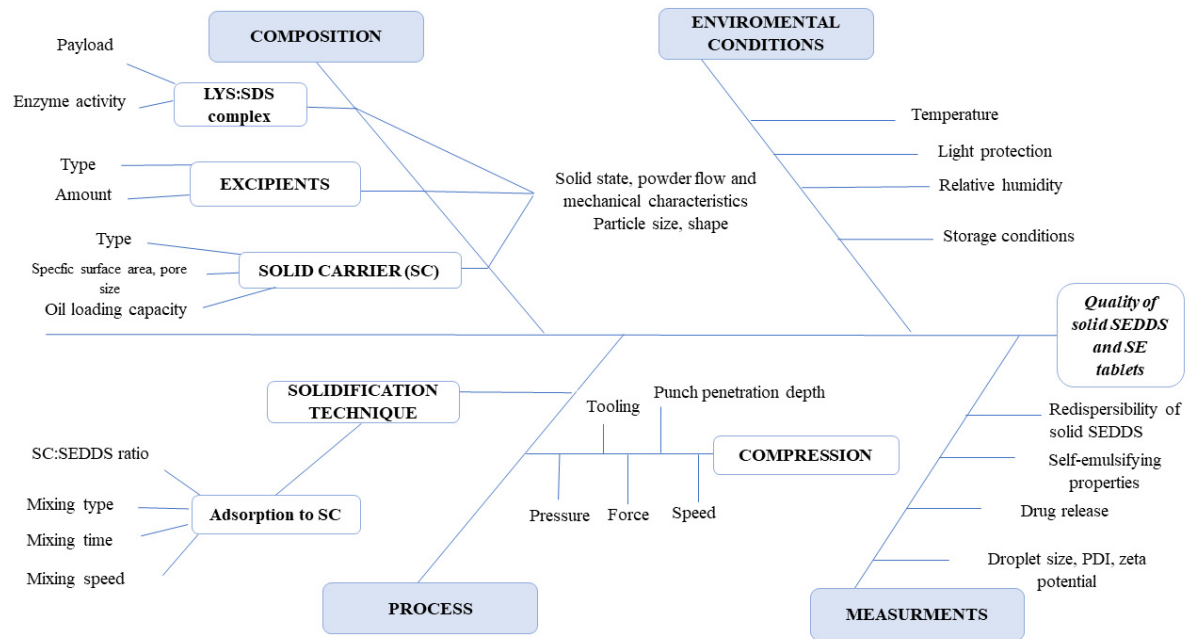

**Figure S3.** Ishikawa diagram -the quality of solid SEDDS loaded with LYS HIP complex.

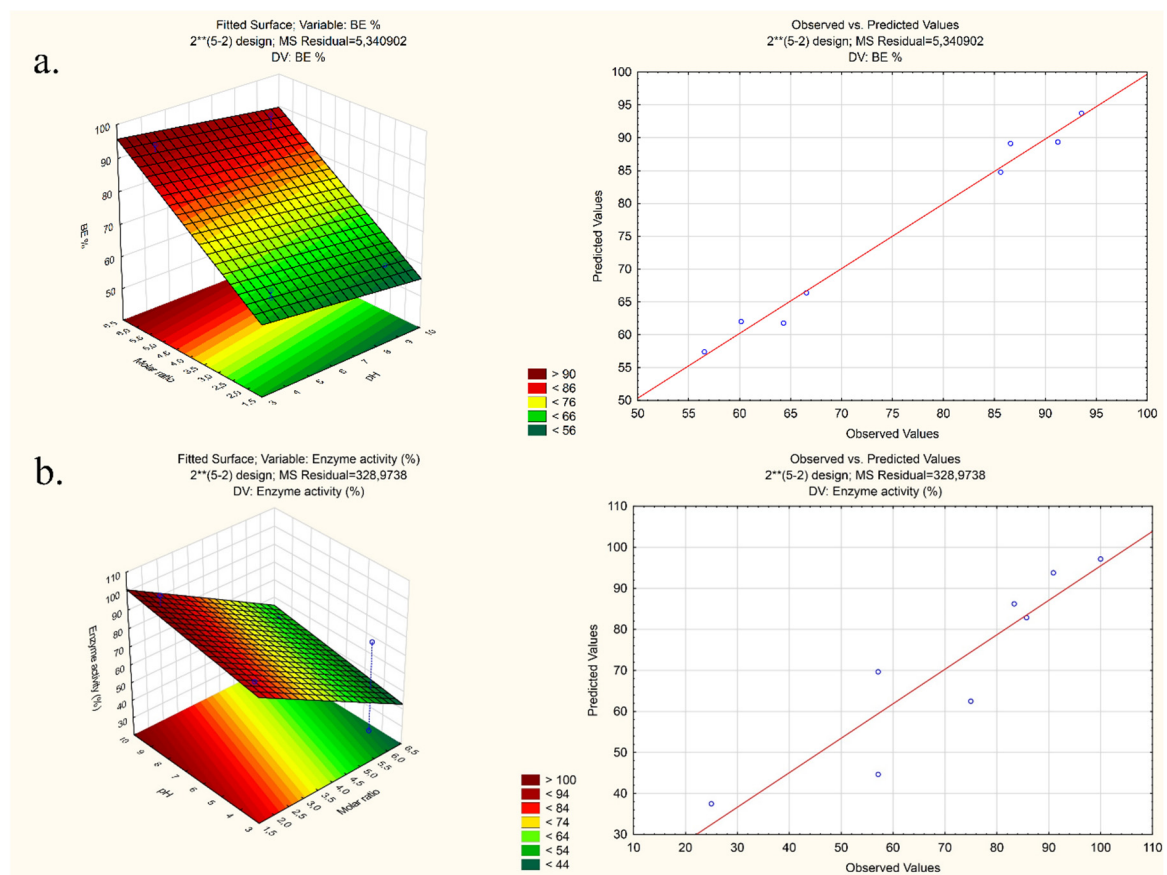

**Figure S4.** Two-level five-factor fractional factorial design ( $2^{5-2}$ ); the response surfaces showing the effect of the significant examined variables on the responses and observed vs. predicted values of (a) binding efficiency (b) enzyme activity.

**Table S3.** Two-level five-factor fractional factorial design ( $2^{5-2}$ )-detail statistical results.

|                 |                                                                                                                                                                         |          |          |          |                     |                     |          |                      |                     |                     |
|-----------------|-------------------------------------------------------------------------------------------------------------------------------------------------------------------------|----------|----------|----------|---------------------|---------------------|----------|----------------------|---------------------|---------------------|
| Factor          | Effect Estimates; Var.:BE %; R-sqr=,98664; Adj:,97662 (Design: $2^{**}(5-2)$ design (Spreadsheet1) in Workbook2) $2^{**}(5-2)$ design; MS Residual=5,340902<br>DV: BE % |          |          |          |                     |                     |          |                      |                     |                     |
|                 | Effect                                                                                                                                                                  | Std.Err. | t(4)     | p        | -95,%<br>(Cnf.Limt) | +95,%<br>(Cnf.Limt) | Coeff.   | Std.Err.<br>(Coeff.) | -95,%<br>(Cnf.Limt) | +95,%<br>(Cnf.Limt) |
| Mean/Interc.    | 75.56912                                                                                                                                                                | 0.817076 | 92.48729 | 0.000000 | 73.30055            | 77.83768            | 75.56912 | 0.817076             | 73.30055            | 77.83768            |
| (1)Molar ratio  | 27.35984                                                                                                                                                                | 1.634151 | 16.74253 | 0.000075 | 22.82271            | 31.89697            | 13.67992 | 0.817076             | 11.41135            | 15.94848            |
| (5)Temperature  | -4.60709                                                                                                                                                                | 1.634151 | -2.81925 | 0.047864 | -9.14422            | -0.06996            | -2.30354 | 0.817076             | -4.57211            | -0.03498            |
| (2)pH           | -4.37424                                                                                                                                                                | 1.634151 | -2.67676 | 0.055415 | -8.91137            | 0.16289             | -2.18712 | 0.817076             | -4.45568            | 0.08145             |
| Factor          | Effect Estimates; Var.:Enzyme activity; R-sqr=,83843; Adj:,62301 (Design: $2^{**}(5-2)$ design) $2^{**}(5-2)$ design; MS Residual=221,7099<br>DV: Enzyme activity       |          |          |          |                     |                     |          |                      |                     |                     |
|                 | Effect                                                                                                                                                                  | Std.Err. | t(3)     | p        | -95,%<br>(Cnf.Limt) | +95,%<br>(Cnf.Limt) | Coeff.   | Std.Err.<br>(Coeff.) | -95,%<br>(Cnf.Limt) | +95,%<br>(Cnf.Limt) |
| Mean/Interc.    | 71,7775                                                                                                                                                                 | 5,26438  | 13,63455 | 0,000853 | 55,0239             | 88,53112            | 71,7775  | 5,264384             | 55,0239             | 88,53112            |
| (1)Molar ratio  | -36,4150                                                                                                                                                                | 10,52877 | -3,45862 | 0,040681 | -69,9222            | -2,90776            | -18,2075 | 5,264384             | -34,9611            | -1,45388            |
| (3)Mixing speed | -14,1800                                                                                                                                                                | 10,52877 | -1,34679 | 0,270755 | -47,6872            | 19,32724            | -7,0900  | 5,264384             | -23,8436            | 9,66362             |
| (5)Temperature  | -10,8200                                                                                                                                                                | 10,52877 | -1,02766 | 0,379722 | -44,3272            | 22,68724            | -5,4100  | 5,264384             | -22,1636            | 11,34362            |
| (2)pH           | 9,0350                                                                                                                                                                  | 10,52877 | 0,85813  | 0,453915 | -24,4722            | 42,54224            | 4,5175   | 5,264384             | -12,2361            | 21,27112            |

**Table S4.** 2<sup>3</sup> full factorial design -detail statistical results.

| Factor         | Effect Estimates; Var.:Binding efficiency (%); R-sqr=,96138; Adj:,92275 (Design: 2**(3-0) design 2**(3-0) design; MS Residual=13,05386<br>DV: Binding efficiency (%) |            |             |            |                     |                     |            |                      |                     |                     |
|----------------|----------------------------------------------------------------------------------------------------------------------------------------------------------------------|------------|-------------|------------|---------------------|---------------------|------------|----------------------|---------------------|---------------------|
|                | Effect                                                                                                                                                               | Std.Err.   | t(2)        | p          | -95,%<br>(Cnf.Limt) | +95,%<br>(Cnf.Limt) | Coeff.     | Std.Err.<br>(Coeff.) | -95,%<br>(Cnf.Limt) | +95,%<br>(Cnf.Limt) |
| Mean/Interc.   | 74.73111                                                                                                                                                             | 1.7028     | 43.88642    | 0.0005     | 67.4044251          | 82.05780            | 74.73111   | 1.7028               | 67.40443            | 82.05780            |
| (1)Molar ratio | 25.46000                                                                                                                                                             | 3.6122     | 7.04824     | 0.0195     | 9.91775181          | 41.00225            | 12.73000   | 1.8061               | 4.95888             | 20.50112            |
| 1 by 3         | -1.07000                                                                                                                                                             | 3.6122     | -0.29621    | 0.7950     | -16.6122482         | 14.47225            | -0.53500   | 1.8061               | -8.30612            | 7.23612             |
| 1*2*3          | 0.57000                                                                                                                                                              | 3.6122     | 0.15780     | 0.8891     | -14.9722482         | 16.11225            | 0.28500    | 1.8061               | -7.48612            | 8.05612             |
| 2 by 3         | -0.42500                                                                                                                                                             | 3.6122     | -0.11766    | 0.9171     | -15.9672482         | 15.11725            | -0.21250   | 1.8061               | -7.98362            | 7.55862             |
| (3)Temperature | 0.09500                                                                                                                                                              | 3.6122     | 0.02630     | 0.9814     | -15.4472482         | 15.63725            | 0.04750    | 1.8061               | -7.72362            | 7.81862             |
| (2)pH          | 0.04500                                                                                                                                                              | 3.6122     | 0.01246     | 0.9912     | -15.4972482         | 15.58725            | 0.02250    | 1.8061               | -7.74862            | 7.79362             |
| Factor         | Effect Estimates; Var.:Enzyme activity (%); R-sqr=,98673; Adj:,96461 (Design: 2**(3-0) design 2**(3-0) design; MS Residual=8,458545<br>DV: Enzyme activity (%)       |            |             |            |                     |                     |            |                      |                     |                     |
|                | Effect                                                                                                                                                               | Std.Err.   | t(2)        | p          | -95,%<br>(Cnf.Limt) | +95,%<br>(Cnf.Limt) | Coeff.     | Std.Err.<br>(Coeff.) | -95,%<br>(Cnf.Limt) | +95,%<br>(Cnf.Limt) |
| Mean/Interc.   | 81.7518                                                                                                                                                              | 1.1682372  | 69.978749   | 0.00020414 | 76.7253             | 86.7782968          | 81.7517778 | 1.1682372            | 76.7253             | 86.7782968          |
| (1)Molar ratio | -19.5163                                                                                                                                                             | 2.47820534 | -7.87515453 | 0.01574454 | -30.1791            | -8.85339303         | -9.758125  | 1.23910267           | -15.0896            | -4.42669652         |
| 1 by 2         | 15.5653                                                                                                                                                              | 2.47820534 | 6.28085565  | 0.02442422 | 4.9024              | 26.228107           | 7.782625   | 1.23910267           | 2.4512              | 13.1140535          |
| (2)pH          | 14.9113                                                                                                                                                              | 2.47820534 | 6.016955    | 0.02652729 | 4.2484              | 25.574107           | 7.455625   | 1.23910267           | 2.1242              | 12.7870535          |
| (3)Temperature | 9.5423                                                                                                                                                               | 2.47820534 | 3.85046786  | 0.06131099 | -1.1206             | 20.205107           | 4.771125   | 1.23910267           | -0.5603             | 10.1025535          |
| 2 by 3         | 2.6098                                                                                                                                                               | 2.47820534 | 1.05308061  | 0.4027547  | -8.0531             | 13.272607           | 1.304875   | 1.23910267           | -4.0266             | 6.63630348          |
| 1 by 3         | 0.6363                                                                                                                                                               | 2.47820534 | 0.25673821  | 0.82137825 | -10.0266            | 11.299107           | 0.318125   | 1.23910267           | -5.0133             | 5.64955348          |

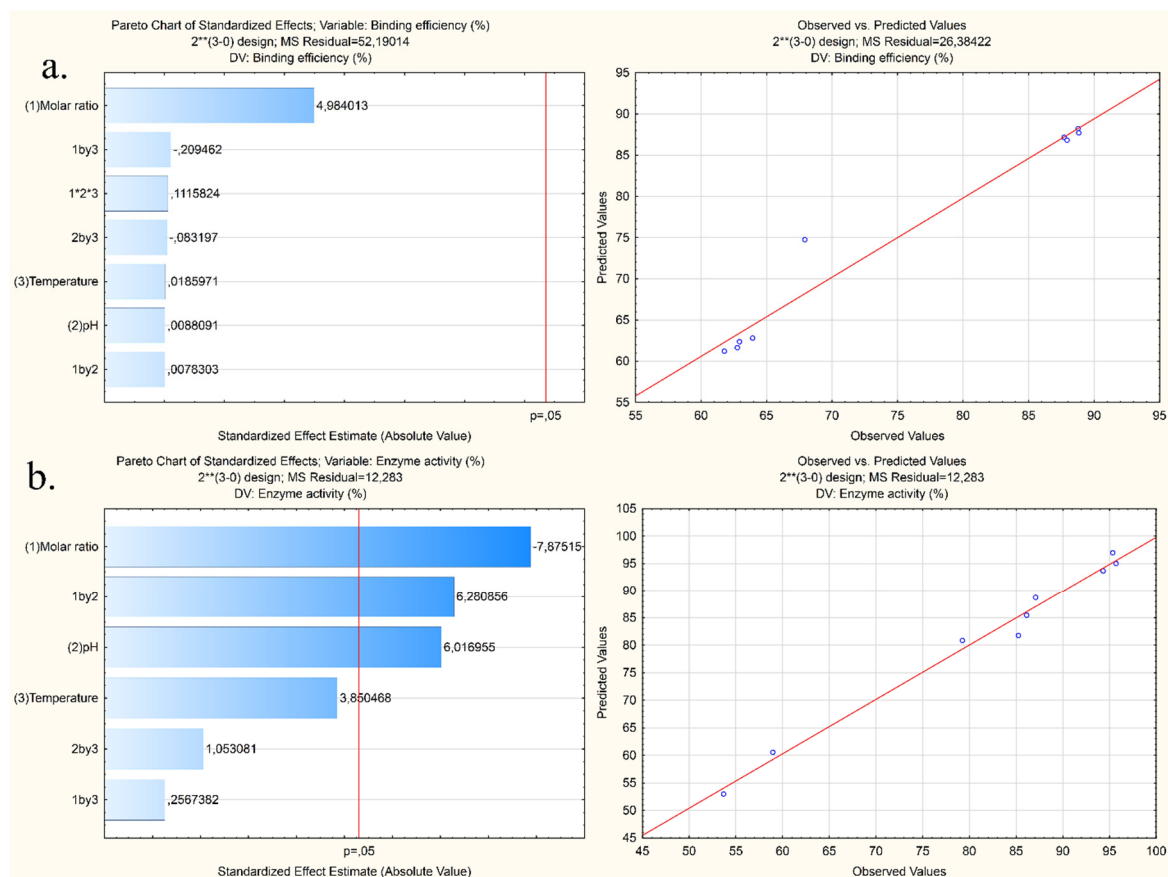

**Figure S5.** Pareto charts of the effects and predicted values of (a) binding efficiency (b) enzyme activity.

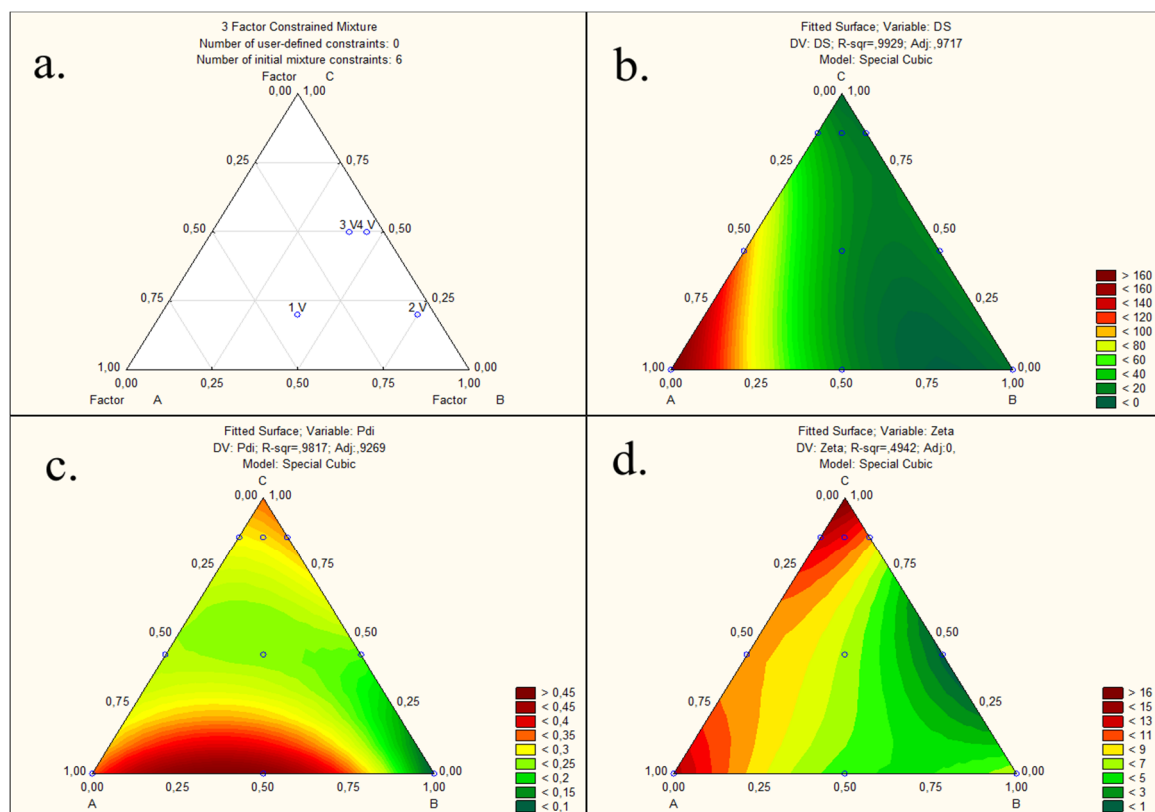

**Figure S6.** (a) 3 factor constrained mixture design; two-dimensional contour plots of (b) droplet size (c) PDI (d) zeta potential.

**Table S5.** Mixture design-detail statistical results.

|        |                                                                                                                                                                                                                                                                                   |          |          |          |          |          |
|--------|-----------------------------------------------------------------------------------------------------------------------------------------------------------------------------------------------------------------------------------------------------------------------------------|----------|----------|----------|----------|----------|
|        | Coeffs (recoded comps); Var.:DS; R-sqr=,9929; Adj:,9717 (3 Factor Constrained Mixture (3 Factor Constrained Mixture ([No active dataset]) in Constrained mixtures) in Constrained mixtures) 3 Factor mixture design; Mixture total=100,, 9 Runs<br>DV: DS; MS Residual=92,81305   |          |          |          |          |          |
| Factor | Coeff.                                                                                                                                                                                                                                                                            | Std.Err. | t(2)     | p        | -95, %   | +95, %   |
| (A)A   | 178.187                                                                                                                                                                                                                                                                           | 9.5949   | 18.57108 | 0.002887 | 136.90   | 219.470  |
| (B)B   | 10.383                                                                                                                                                                                                                                                                            | 9.5949   | 1.08214  | 0.392307 | -30.90   | 51.666   |
| (C)C   | 6.220                                                                                                                                                                                                                                                                             | 10.0419  | 0.61938  | 0.598823 | -36.99   | 49.427   |
| AB     | -280.019                                                                                                                                                                                                                                                                          | 47.1869  | -5.93425 | 0.027242 | -483.05  | -76.990  |
| AC     | -2.723                                                                                                                                                                                                                                                                            | 51.9775  | -0.05240 | 0.962976 | -226.36  | 220.918  |
| BC     | 40.850                                                                                                                                                                                                                                                                            | 51.9775  | 0.78592  | 0.514240 | -182.79  | 264.491  |
| ABC    | -447.191                                                                                                                                                                                                                                                                          | 352.0373 | -1.27029 | 0.331762 | -1961.89 | 1067.503 |
|        |                                                                                                                                                                                                                                                                                   |          |          |          |          |          |
|        | Coeffs (recoded comps); Var.:DS; R-sqr=,9929; Adj:,9811 (3 Factor Constrained Mixture (3 Factor Constrained Mixture ([No active dataset]) in Constrained mixtures) in Constrained mixtures) 3 Factor mixture design; Mixture total=100,, 9 Runs<br>DV: DS; MS Residual=61,9603    |          |          |          |          |          |
| Factor | Coeff.                                                                                                                                                                                                                                                                            | Std.Err. | t(3)     | p        | -95, %   | +95, %   |
| (A)A   | 177.964                                                                                                                                                                                                                                                                           | 7.0267   | 25.32689 | 0.000135 | 155.60   | 200.326  |
| (B)B   | 10.353                                                                                                                                                                                                                                                                            | 7.8259   | 1.32296  | 0.277649 | -14.55   | 35.259   |
| (C)C   | 5.883                                                                                                                                                                                                                                                                             | 6.3072   | 0.93278  | 0.419740 | -14.19   | 25.955   |
| AB     | -279.522                                                                                                                                                                                                                                                                          | 37.7693  | -7.40078 | 0.005103 | -399.72  | -159.324 |
| BC     | 41.920                                                                                                                                                                                                                                                                            | 39.0572  | 1.07329  | 0.361793 | -82.38   | 166.217  |
| ABC    | -455.060                                                                                                                                                                                                                                                                          | 260.1446 | -1.74926 | 0.178559 | -1282.96 | 372.836  |
|        |                                                                                                                                                                                                                                                                                   |          |          |          |          |          |
|        | Coeffs (recoded comps); Var.:Pdi; R-sqr=,9817; Adj:,9269 (3 Factor Constrained Mixture (3 Factor Constrained Mixture ([No active dataset]) in Constrained mixtures) in Constrained mixtures) 3 Factor mixture design; Mixture total=100,, 9 Runs<br>DV: Pdi; MS Residual=,0007926 |          |          |          |          |          |
| Factor | Coeff.                                                                                                                                                                                                                                                                            | Std.Err. | t(2)     | p        | -95, %   | +95, %   |
| (A)A   | 0.34727                                                                                                                                                                                                                                                                           | 0.028039 | 12.38524 | 0.006456 | 0.22663  | 0.467907 |
| (B)B   | 0.09636                                                                                                                                                                                                                                                                           | 0.028039 | 3.43677  | 0.075234 | -0.02428 | 0.217004 |
| (C)C   | 0.34349                                                                                                                                                                                                                                                                           | 0.029345 | 11.70518 | 0.007220 | 0.21723  | 0.469752 |
| AB     | 1.03423                                                                                                                                                                                                                                                                           | 0.137893 | 7.50022  | 0.017316 | 0.44092  | 1.627530 |
| AC     | -0.38345                                                                                                                                                                                                                                                                          | 0.151892 | -2.52448 | 0.127568 | -1.03699 | 0.270090 |
| BC     | 0.12711                                                                                                                                                                                                                                                                           | 0.151892 | 0.83687  | 0.490728 | -0.52642 | 0.780654 |
| ABC    | -2.40518                                                                                                                                                                                                                                                                          | 1.028748 | -2.33797 | 0.144358 | -6.83153 | 2.021161 |
|        |                                                                                                                                                                                                                                                                                   |          |          |          |          |          |
|        | Coeffs (recoded comps); Var.:Pdi; R-sqr=,9753; Adj:,9342 (3 Factor Constrained Mixture (3 Factor Constrained Mixture ([No active dataset]) in Constrained mixtures) in Constrained mixtures) 3 Factor mixture design; Mixture total=100,, 9 Runs<br>DV: Pdi; MS Residual=,0007134 |          |          |          |          |          |
| Factor | Coeff.                                                                                                                                                                                                                                                                            | Std.Err. | t(3)     | p        | -95, %   | +95, %   |
| (A)A   | 0.34865                                                                                                                                                                                                                                                                           | 0.026555 | 13.12904 | 0.000954 | 0.26414  | 0.433159 |
| (B)B   | 0.10677                                                                                                                                                                                                                                                                           | 0.023843 | 4.47787  | 0.020764 | 0.03089  | 0.182648 |
| (C)C   | 0.35920                                                                                                                                                                                                                                                                           | 0.021402 | 16.78342 | 0.000461 | 0.29109  | 0.427308 |



|        |                                                                                                                                                                                                                                                                                 |          |           |          |          |           |
|--------|---------------------------------------------------------------------------------------------------------------------------------------------------------------------------------------------------------------------------------------------------------------------------------|----------|-----------|----------|----------|-----------|
| AB     | 1.01106                                                                                                                                                                                                                                                                         | 0.128161 | 7.88893   | 0.004245 | 0.60319  | 1.418923  |
| AC     | -0.43337                                                                                                                                                                                                                                                                        | 0.132531 | -3.26991  | 0.046780 | -0.85514 | -0.011591 |
| ABC    | -2.03789                                                                                                                                                                                                                                                                        | 0.882740 | -2.30859  | 0.104165 | -4.84716 | 0.771387  |
|        |                                                                                                                                                                                                                                                                                 |          |           |          |          |           |
|        | Coeffs (recoded comps); Var.:Zeta; R-sqr=,4942; Adj:0, (3 Factor Constrained Mixture (3 Factor Constrained Mixture ([No active dataset]) in Constrained mixtures) in Constrained mixtures) 3 Factor mixture design; Mixture total=100,, 9 Runs DV: Zeta; MS Residual=69,48256   |          |           |          |          |           |
| Factor | Coeff.                                                                                                                                                                                                                                                                          | Std.Err. | t(2)      | p        | -95,%    | +95,%     |
| (A)A   | 13.6188                                                                                                                                                                                                                                                                         | 8.3018   | 1.640465  | 0.242595 | -22.10   | 49.339    |
| (B)B   | 6.9348                                                                                                                                                                                                                                                                          | 8.3018   | 0.835335  | 0.491423 | -28.78   | 42.654    |
| (C)C   | 16.0176                                                                                                                                                                                                                                                                         | 8.6886   | 1.843516  | 0.206571 | -21.37   | 53.402    |
| AB     | -19.4014                                                                                                                                                                                                                                                                        | 40.8277  | -0.475202 | 0.681482 | -195.07  | 156.266   |
| AC     | -21.9548                                                                                                                                                                                                                                                                        | 44.9727  | -0.488179 | 0.673699 | -215.46  | 171.547   |
| BC     | -41.9080                                                                                                                                                                                                                                                                        | 44.9727  | -0.931854 | 0.449786 | -235.41  | 151.594   |
| ABC    | 97.5327                                                                                                                                                                                                                                                                         | 304.5945 | 0.320205  | 0.779171 | -1213.03 | 1408.097  |
|        |                                                                                                                                                                                                                                                                                 |          |           |          |          |           |
|        | Coeffs (recoded comps); Var.:Zeta; R-sqr=,3962; Adj:,0339 (3 Factor Constrained Mixture (3 Factor Constrained Mixture ([No active dataset]) in Constrained mixtures) in Constrained mixtures) 3 Factor mixture design; Mixture total=100,, 9 Runs DV: Zeta; MS Residual=33,1751 |          |           |          |          |           |
| Factor | Coeff.                                                                                                                                                                                                                                                                          | Std.Err. | t(5)      | p        | -95,%    | +95,%     |
| (A)A   | 10.8101                                                                                                                                                                                                                                                                         | 4.70099  | 2.29953   | 0.069813 | -1.274   | 22.89438  |
| (B)B   | 5.3952                                                                                                                                                                                                                                                                          | 5.23042  | 1.03151   | 0.349592 | -8.050   | 18.84044  |
| (C)C   | 13.4962                                                                                                                                                                                                                                                                         | 4.60068  | 2.93354   | 0.032499 | 1.670    | 25.32266  |
| BC     | -30.8114                                                                                                                                                                                                                                                                        | 27.10625 | -1.13669  | 0.307192 | -100.490 | 38.86738  |

**Table S6.** Properties of investigated solid carriers and their ability to adsorb optimal liquid SEDDS formulation.

| <i>Solid carrier (SC)</i> | <i>Characteristics (according to manufacturer)</i>                                                       | <i>Ratio (SC:SEDDS)</i> | <i>Visual observation</i>         | <i>Max. SEDDS loading capacity (g/100g SC)</i> |
|---------------------------|----------------------------------------------------------------------------------------------------------|-------------------------|-----------------------------------|------------------------------------------------|
| Neusilin® UFL2            | PS: 3.1 µm<br>Specific surface area (m <sup>2</sup> /g): 300<br>Oil adsorbing capacity (ml/g): 2.7 - 3.4 | 1:1                     | Good ✓                            | 300.0                                          |
|                           |                                                                                                          | 1:2                     | Good ✓                            |                                                |
|                           |                                                                                                          | 1:3                     | Sticky powder ✓                   |                                                |
|                           |                                                                                                          | 1:4                     | Poor, overwetted                  |                                                |
| Syloid® AL-1 FP           | PS: 6.5–8.1 µm<br>Specific surface area (m <sup>2</sup> /g): 675<br>Oil adsorbing capacity (g/g): 80     | 1:1                     | Sticky powder, greasy appearance✓ | 100.0                                          |
|                           |                                                                                                          | 1:2                     | Poor, overwetted                  |                                                |
|                           |                                                                                                          | 1:3                     | Poor, overwetted                  |                                                |
| Syloid® 244 FP            | PS: 2.3–3.7 µm<br>Specific surface area (m <sup>2</sup> /g): 310<br>Oil adsorbing capacity (g/g): 300    | 1:1                     | Good ✓                            | 200.0                                          |
|                           |                                                                                                          | 1:2                     | Sticky powder ✓                   |                                                |
|                           |                                                                                                          | 1:3                     | Sticky powder ✓                   |                                                |
